# Supplementary material for: Role of Complex Epigenetic Switching in Tumor Necrosis Factor-α Upregulation in the Prefrontal Cortex of Suicide Subjects
Source: Atypon-hosted journal article supplement (doi:10.1176/appi.ajp.2017.16070759), 2018-01-24
Supplement: appi.ajp.2017.16070759.ds001.pdf [file appi.ajp.2017.16070759.ds001.pdf]

## Supplementary Material Section

### Human postmortem brain studies

#### *Subjects*

The study was approved by the Institutional Review Board of the University of Alabama at Birmingham. Brain tissues were obtained from the Quebec Suicide Brain Bank as well as Maryland Brain Collection, Baltimore. Family members/informants signed written informed consents. Psychiatric diagnoses of the subjects were made by psychological autopsy using DSM-IV (1) criteria by means of SCID-I interviews (2). SCID-I is a structured diagnostic procedure to elicit diagnostic information by means of proxy-based interviews complemented with medical and coroner records, followed by a consensus diagnosis reached by a panel of clinicians using DSM-IV criteria. Both cases and controls were characterized by the same psychological autopsy methods, therefore avoiding the occurrence of systematic biases.

The demographic and clinical characteristics of subjects and normal controls obtained from Quebec Suicide Brain Bank are provided in Table S2. All subjects were of French Canadian origin, a homogeneous population with a well-defined founder effect (3). The study was performed in dlPFC (Brodmann area [BA] 10) obtained from right hemisphere of 16 non-psychiatric controls (referred as normal controls) and 43 suicide subjects.

Out of 43 suicide subjects from Quebec Suicide Brain Bank, 21 subjects were diagnosed with MDD and 22 subjects had other psychiatric illnesses (1 obsessive compulsive disorder, 4 schizophrenias, 5 bipolar disorder/4 alcohol abuse/1 adjustment disorder/6 had no diagnosed psychiatric illness/1 not done). Psychiatric diagnosis in one subject was not known. The cause of death of normal controls and suicide subjects is listed in Table S2. Of all the suicide subjects, 7 showed positive antidepressant toxicology. There were no significant differences in age ( $p = 0.25$ ), PMI ( $p = 0.75$ ), brain pH ( $p = 0.69$ ) or RIN ( $p = 0.58$ ) between suicide subjects and normal controls. Also, the age ( $p = 0.25$ ), PMI ( $p = 0.75$ ), brain pH ( $p = 0.28$ ) or RIN ( $p = 0.44$ ) were not significantly different between MDD-suicide and suicide subjects with other psychiatric illnesses (Table S2).

From Maryland Psychiatric Research Center, we performed experiments in dlPFC (BA 10) of 12 MDD-non-suicide, 14 MDD-suicide, and 12 normal controls (Table S3). There were 9 males and 3 females in both MDD-non-suicide group and MDD-suicide groups and 10 males and 4 females in the normal control group. The PMI in the three groups were <24 hours and were not statistically significant ( $df = 2,35$ ,  $F = 0.07$ ,  $p = 0.93$ ). Brain pH ( $df = 2,35$ ,  $F = 0.69$ ,  $p = 0.51$ ) and RIN ( $df=2,35$ ,  $F=0.28$ ,  $p=0.76$ ) were also not significantly different between the 3 groups. Of 12 MDD-non-suicide, 9 died by atherosclerosis cardiovascular disease (ASCVD), 1 by vehicle accident, 1 by diabetes ketoacidosis, and 1 by cardiomegaly. In the MDD-suicide group, 3 died by hanging, 4 by gunshot wound, 1 by chest stab wound, 2 by CO poisoning, and 4 by drug overdose. In the normal control group, 4 died by ASCVD, 2 by accidental death, 1 by natural death, 2 by cardiac arrhythmia, 2 by pneumonia, and 1 by embolism. Five subjects had positive antidepressant toxicology in the MDD-non-suicide group and 2 in the MDD-suicide group.

#### *Postmortem tissue*

Brain tissue samples were carefully dissected at 4°C after having been flash-frozen in isopentane at -80°C. Dissection was performed by histopathologists using reference neuroanatomical maps

45 (4, 5). All tissues from normal controls and suicide subjects were screened for evidence of  
46 neuropathology. Samples were excluded if they exhibited features of Alzheimer's disease,  
47 infarctions, demyelinating diseases, or atrophy. Subjects with substance dependence were  
48 excluded from the study. Toxicology and presence of antidepressants were examined by analysis  
49 of urine and blood samples from these subjects. pH of the brain was measured in all cases as  
50 described by Harrison et al. (1995) (6).

51

### 52 ***RNA Isolation from human dlPFC and mRNA analysis of TNF- $\alpha$ , TRBP and HuR expression***

53 Total RNA from human dlPFC was isolated with Trizol® reagent (Invitrogen, Carlsbad, CA,  
54 USA) according to manufacturer's protocol with a few modifications to maximize yield of small  
55 RNAs. Glycoblue 20  $\mu$ g (Ambion, Waltham, MA, USA) was added to the RNA precipitation  
56 step which was allowed to proceed overnight at -20°C. RNA was treated with DNase I. The  
57 RNA samples were screened based on their purity (260/280 cutoff  $\geq 1.8$ ) as determined with  
58 NanoDrop spectrophotometer (ThermoScientific, Waltham, MA, USA). Since RNA integrity  
59 may affect the expression of genes and may pose a confounding factor, we measured pH and  
60 RNA Integrity Number (RIN) in all the samples included in this study. The mean pH and RIN  
61 are provided in Tables S2 and 3 for McGill cohort and Maryland cohort, respectively. All the  
62 cases had RIN $>7$ .

63 The extracted RNA was reverse transcribed into first-strand cDNA using M-MLV Reverse  
64 Transcriptase (Invitrogen, Grand Island, NY, USA). A mixture of 1  $\mu$ g of total RNA, oligo (dT)<sub>18</sub>,  
65 dNTP, and double distilled water was incubated at 65°C for 5 minutes and quickly chilled on the  
66 ice. Subsequently, the reaction mixture was added with 1 x 1<sup>st</sup> strand synthesis buffer, 0.01 mM  
67 DTT, 2 U of RNaseOut and 200 U of M-MLV reverse transcriptase (Invitrogen, Grand Island,  
68 NY, USA) and incubated at 37°C for 50 min. Finally, the reaction was inactivated at 70°C. qRT-  
69 PCR was carried out in 96-well plates with an Mx3005P qPCR machine (Stratagen, La Jolla, CA,  
70 USA) using 1x EvaGreen qPCR MasterMix (Applied Biological Material, Richmond, BC,  
71 Canada). Each reaction mixture contained 5  $\mu$ l of 40-fold diluted cDNA, 10  $\mu$ l of EvaGreen 2x  
72 qPCR MasterMix, 0.8  $\mu$ M of each primer, and nuclease-free water to a final volume of 25  $\mu$ l.  
73 The thermal cycling program was as follows: 95°C for 10 min, followed by 40 cycles of 95°C for  
74 15 s, 58°C for 20s and 72°C for 20s in 96-well optical reaction plates (Bio-Rad, Hercules, CA,  
75 USA). The melting curves were analyzed at 59-95°C after 40 cycles. The amplification products  
76 were checked on 3% agarose gels. Each qRT-PCR analysis was performed with three technical  
77 replicates. Relative gene expression level was quantified after normalization with GAPDH as  
78 reference gene and fold change values were determined following  $2^{-\Delta\Delta C_t}$  calculation method.

79

### 80 **Genetic studies**

81 Genomic DNA was extracted from the postmortem brain tissues using QIAamp® genomic DNA  
82 kit (Qiagen, Qiagen, Hilden, Germany). The concentration of extracted genomic DNA was  
83 measured with NanoDrop spectrophotometer (ABI) and the OD260/OD280 was used for  
84 detecting any residual contaminants (like, phenol, guanidine, or other reagent used in the  
85 extraction protocol) in DNA preparation. Three SNPs were selected as candidate common  
86 variants to investigate the risks of TNF- $\alpha$  for suicidal behaviour.

87 PCR was conducted with a final 50  $\mu$ l reaction volume including 1x standard Taq  
88 reaction buffer, 1.5 mM MgCl<sub>2</sub>, 200 mM dNTPs, 10 pm each primer, 50 ng DNA, and 1.25U Hot  
89 Start Taq DNA polymerase (NEB, Ipswich, MA, USA). The PCR reaction was as followed: 10  
90 min at 95°C, 42 cycles at 95°C for 30s, 58°C for 40s, 72°C for 50s and 10 min at 72°C using the

91 GeneAmp PCR System 9700 (Applied BioSystems, Foster City, CA, USA). Subsequently, PCR  
92 products were extracted from agarose gel after electrophoresis and purified using the QIAquick  
93 gel extraction kit (Qiagen, Hilden, Germany) according to the manufacturer's instructions.  
94 Sequencing reactions were then performed using the sequencing primers along with Big-Dye  
95 Terminator v3.1 Cycle Sequencing kit (Applied Biosystems, Foster City, CA, USA) and cleaned  
96 with CleanSEQ before running on an ABI 3730xl DNA Analyzer (Applied Biosystems, Foster  
97 City, CA, USA). Base calling, quality assessment, and assembly were carried out using the Phred,  
98 Phrap, Polyphred, Consed software suites. All sequence variants identified were analyzed using  
99 Chromas (Technelysium Pty Ltd, South Brisbane, Australia) and BLAST (National Library of  
100 Medicine, Bethesda, MD, USA) software.

101 To screen the rare mutations in the TNF- $\alpha$  3-UTR region and miR-19a-3p, the targeted  
102 DNA fragments were sequenced from genomic DNA of dLPFC of suicide and normal control  
103 subjects. The DNA fragments of TNF- $\alpha$  3'UTR and miR-19a-3p gene were amplified by PCR.  
104 Briefly, 20 ng of genomic DNA from each tissue was amplified as template in 50  $\mu$ l PCR  
105 reaction mixture using AmpliTaq Gold (Applied Biosystems, Foster City, CA, USA) DNA  
106 polymerase. The primer sequences were listed in the Table S4. Similar sequencing methods were  
107 followed as described in the previous section.

108

### 109 **MeDIP analysis**

110 Genomic DNA was extracted using Wizard Genomic DNA purification kit (Promega, Woods  
111 Hollow Road, Madison, USA) following the manufacturer's instructions. DNA concentration  
112 was measured with a NanoDrop spectrophotometer (ThermoScientific, Waltham, MA, USA).  
113 Two micograms of DNA were then sheared by sonication into fragments between 200 bp and  
114 1000 bp. The sonication system was set for 30 sec on and 30 sec off position at maximum power.  
115 After sonication, 1.6  $\mu$ g DNA was removed from sonicated product and then processed for  
116 immunoprecipitation. The remaining 400 ng sonicated DNA was saved and used as input  
117 reference DNA. Next, the DNA was denatured at 95°C for 10 min and immediately placed on  
118 ice for 10 min. Subsequently, the denatured DNA was incubated with 5  $\mu$ g anti-5-  
119 Methylcytosine antibody (Zymo Research, Irvine, CA, USA). This was pre-washed with 100  $\mu$ l  
120 of Protein G magnetic bead with 500  $\mu$ l PBS-BSA (0.1%) three times and then added to the  
121 immunoprecipitation samples. After overnight incubation at 4°C with overhead shaking, the  
122 magnetic beads were collected and washed three times with 500  $\mu$ l 1x IP buffer [10 mM  
123 sodium phosphate (pH 7.0), 0.14 M NaCl, and 0.05% Triton X-100]. Subsequently, the protein-  
124 DNA complex was digested by proteinase K for 30 min at 50°C and DNA was extracted by  
125 DNA extraction kit (Promega, Woods Hollow Road, Madison, USA). RT-PCR was conducted to  
126 detect the methylation status in the TNF- $\alpha$  promoter region with immunoprecipitated and input  
127 samples. The primers sequences are listed in Table S4.

### 128 **MiRNA study**

129

#### 130 ***Analysis of miRNAs in dLPFC***

131 Based on miRTarBase target prediction analysis, 6 potential miRNAs (miR-130a-3p, miR-143-  
132 3p, miR-187-3p, miR-203a-3p, miR-452-5p, and miR-19a-3p) were identified as target for TNF-  
133  $\alpha$  3'UTR. qPCR based primers (Table S4) were designed based on the mature miRNA sequences  
134 to detect their expression levels. Ten other miRs (miR-17-5p, miR-17-3p, miR-18a-5p, miR-18a-  
135 3p, miR-20a-5p, miR-20a-3p, miR-19b-1-5p, miR-19b-1-3p, miR-92-1-5p and miR-92-1-3p)  
136 encoded by the 5 cluster members besides miR-19a-3p from the same miR-17-92 cluster were

137 additionally tested for their expression in dIPFC of suicide subjects and healthy controls. qPCR  
138 based primers for all the miRNAs were also listed in the same primer table (Table S4).

139 Relative quantification of mature miRNAs was examined following a poly (A) tailing  
140 method. Polyadenylation of short RNAs was performed by adding 5 U of Escherichia  
141 coli poly(A) polymerase to 1x Poly(A) Polymerase reaction buffer, 2.5 mM MnCl<sub>2</sub>, 1 mM rATP  
142 and 40 U of RNaseOut (New England Biolabs, Ipswich, MA, USA) in a 10 µl reaction volume.  
143 The reaction mixture was initially incubated for 30 min at 37°C, followed by the addition of  
144 1 µM oligo dT adapter primer (Table S4) and then quick incubation for 5 min at 65°C. Reaction  
145 was finally cooled to 4°C before proceeding to complementary DNA (cDNA) synthesis. The  
146 poly(A)-tailed RNA mixture was reverse transcribed following M-MLV RT-mediated 1st strand  
147 cDNA synthesis method as mentioned in manufacturer's protocol (Invitrogen, Grand Island, NY,  
148 USA).

149 Relative transcript abundance of specific miRNA was quantified using EvaGreen in the  
150 MX3005P qPCR system (Stratagene, Santa Clara, CA, USA). Briefly, mature miRNA was  
151 amplified using 1x EvaGreen qPCR Mastermix (Applied Biological Material, Richmond, BC,  
152 Canada) in combination with 0.8 µM each of gene-specific forward primer and oligo dT adapter  
153 sequence specific universal reverse primer. The primers sequences are listed in the Table S4.  
154 Forty-fold diluted raw cDNA was used as a template for qRT-PCR amplification.  
155 The PCR conditions for miR-130a-3p, miR-143-3p, miR-187-3p, miR-203a-3p, miR-452-5p,  
156 and miR-19a-3p were as follows: 95°C for 10 min, followed by 40 cycles of 95°C for 15s, and  
157 60°C for 45s. The dissociation curve analysis was performed with initial denaturation at 95 °C  
158 for 1 min followed by annealing at 60°C for 30s and repeat denaturation at 95°C for 30s. As an  
159 internal control primer for U6 were added for RNA template normalization and the relative  
160 quantification of miRNA expressions was calculated following 2<sup>-ΔΔCt</sup> method.

161

## 162 ***In vitro* studies to detect miR-19a-3p and TNF-α interaction**

163

### 164 ***Luciferase reporter assay***

165 Luciferase assay was performed using pMIR-REPORT<sup>TM</sup> miRNA expression reporter vector  
166 system (Ambion, Waltham, MA, USA). pMIR-REPORT firefly luciferase (FL) plasmids were  
167 purified with QIAprep Spin Miniprep Kit (Qiagen, Hilden, Germany) and digested with  
168 restriction enzymes *SpeI* and *HindIII* (New England BioLabs, Ipswich, MA, USA). Linearized  
169 vectors from the restriction digestion were retrieved by agarose gel electrophoresis and gel  
170 purification of DNA with Gel Extraction Kit (Qiagen, Hilden, Germany). The 192 bp fragment  
171 within the 3'-UTR region of TNF-α gene containing miR-19a-3p binding sites were amplified  
172 from human genomic DNA. The PCR primers are listed in Table S4. Restriction enzyme sites for  
173 *SpeI* and *HindIII* were introduced into the PCR products via adaptor sequence attached with  
174 primer oligo to facilitate directional cloning. The digested PCR fragment was inserted into  
175 downstream of firefly reporter gene in the pMIR-REPORT vector with T4 DNA ligase (New  
176 England BioLabs, Ipswich, MA, USA) and subsequently transformed in DH5α competent cells  
177 (Invitrogen, Grand Island, NY, USA). After validation by sequencing, pMIR-TNFα plasmid was  
178 purified using Qiagen plasmid Midiprep kit (Qiagen, Hilden, Germany).

179 Firefly and Renilla luciferase activities were detected with the Dual-Luciferase assay kit  
180 (Promega, Madison, WI, USA). HEK-293 cells were cultured and co-transfected in 24-well  
181 plates with 400 ng pMIR-TNFα, 100 nM miR-19a-3p mimics or mimic negative controls, and 40  
182 ng of pRL-TK control vector encoding Renilla luciferase (Promega, Madison, WI, USA). The

183 transfection was performed with Lipofectamine<sup>TM</sup> 2000 (Invitrogen, Grandland, NY, USA).  
184 Forty-eight hours after transfection, the cells were harvested in passive lysis buffer and  
185 Firefly/Renilla luciferase activities were measured on a Multi-Mode Microplate Reader (Biotek,  
186 Winooski, VT, USA). The luciferase data is expressed as a ratio of Firefly/Renilla to normalize  
187 transfection variability between groups. Luciferase experiments were repeated three times in  
188 triplicate.

189

#### 190 ***Cell culture and transfection of miRNA mimics***

191 SH-SY5Y and HEK-293 cells were cultured in DMEM containing 10% fetal bovine serum, 2  
192 mM glutamine, and penicillin and streptomycin (10000U/ml). The cells were incubated at 37°C  
193 in a 5% CO<sub>2</sub> atmosphere and the medium was refreshed every 24h. Transient transfections of  
194 miR-19a-3p mimics or negative control (Dharmacon, Lafayette, CO, USA) were performed  
195 using Lipofectamine RNAiMAX (Invitrogen, Grandland, NY, USA) according to the  
196 manufacturer's protocol.

197

#### 198 ***RNA extraction and relative quantification of TNF- $\alpha$ transcript in cell lines***

199 Total mRNA was extracted from the transfected SH-SY5Y after 48h. Total RNA was isolated  
200 following TRIzol<sup>®</sup> method (Invitrogen, Grandland, NY, USA) as described earlier which was  
201 slightly modified to optimize the recovery of small RNAs by adding twenty microgram of  
202 glycogen (Roche Life Science, Indianapolis, IN, USA) at alcohol precipitation step and  
203 incubating overnight at -20°C before ethanol wash. The purity and concertation of RNA was  
204 measured by NanoDrop Spectrophotometer (ThermoScientific, Waltham, MA, USA) with the  
205 ratio of absorbance at 260 nm and 280 nm.

206

#### 207 ***Cell proliferation assay***

208 Cell proliferation was measured by MTT (3-(4, 5-dimethylthiazolyl-2)-2, 5-diphenyltetrazolium  
209 bromide) assay. Briefly, cells were plated at density of  $1 \times 10^3$  cells per well in 96 well plate  
210 before transfection (BD Biosciences, Bedford, MA, USA). MiRNA oligonucleotide was  
211 transfected into SH-SY5Y cells with Lipofectamine RNAiMAX. After 48h, 20  $\mu$ l of MTT (5  
212 mg/mL) (Sigma-Aldrich, St. Louis, MO, USA) was added to each well and the plate was  
213 incubated for 4h at 37°C in a CO<sub>2</sub> incubator. The Formazan crystals formed were dissolved in  
214 dimethyl sulfoxide (Sigma-Aldrich, St. Louis, MO, USA) and absorbance of each well was  
215 measured at 570 nm in a Synergy HT microplate reader (Biotek, Winooski, VT, USA).

216

#### 217 **HuR analysis**

218

#### 219 ***In vitro analysis of HuR regulation on TNF- $\alpha$ expression***

220 To determine the influence of HuR on TNF- $\alpha$  mRNA stability, siRNA oligonucleotide for HuR,  
221 negative control (Santa Cruz company), and pCMV-GFP-HuR vector were transfected into  
222 HEK-293 cell lines with Lipofectamine<sup>TM</sup> 2000 reagents. Before 12h of transfection, the HEK-  
223 293 cells were seeded into 6-wells plate. 30 pmol siRNA and negative control, 14  $\mu$ g pCMV-  
224 GFP-HuR plasmid were transfected into the cells grown in each well of the 6-well plates. After  
225 48 hours of transfection, the cells were collected. Then, mRNA and proteins were extracted from  
226 the transfected cells. RT-PCR and Western blotting were used to measure the expression of HuR.  
227 RT-PCR assay was performed as described in the postmortem brain tissue section to detect the  
228 TNF- $\alpha$  and HuR expression.

229 HEK 293 cell line was cultured in the 24 well plates and transfected using  
230 Lipofectamine<sup>TM</sup> 2000 methods. pEZX-TNF vector containing full length TNF- $\alpha$  3'-UTR  
231 sequence (Accession: NM\_000594.3), Firefly luciferase and Renilla luciferase was purchased  
232 from GeneCopoeia, Inc. (Rockville, MD, USA). Co-transfection of 5  $\mu$ g pEZX-TNF, 5  $\mu$ g  
233 pCMV-GFP-HuR, and 5  $\mu$ g pCMV-GFP-HuR plasmids were done in HEK 293 cells per well.  
234 Cell extracts were collected 48h after transfection, and luciferase activity was measured using the  
235 Dual-Light System (Promega, Madison, WI, USA). Similar method was followed as mentioned  
236 in the TNF- $\alpha$  3'UTR luciferase reporter assay section.

237

### 238 ***Immunoblotting of HuR protein expression***

239 Protein lysates prepared in 1X RIPA buffer were boiled for 5 min, vortexed, and then centrifuged  
240 for 2 min. The samples were loaded on 12.5% (w/v) polyacrylamide gel using the Mini Protean  
241 II gel apparatus (Bio-Rad, Hercules, CA, USA). The gels were run using 25 mM Tris base, 192  
242 mM glycine, and 0.1% (w/v) SDS at 100 V. The proteins were subsequently transferred  
243 electrophoretically using 25 mM Tris base, 0.2 M glycine, and 20% methanol (pH 8.5) to PVDF  
244 membrane using the Mini Trans-Blot transfer unit (Bio-Rad Laboratories, Hercules, CA, USA)  
245 at 0.15-A constant current. The blotted membrane was blocked by incubating with 5% (w/v)  
246 powdered non-fat milk in TBST, 0.2% (v/v) Nonidet P-40, and 0.02% (w/v) SDS (pH 8.0) for 1  
247 h and were incubated overnight at 4°C with HuR primary antibody (Santa Cruz Biotechnology,  
248 Dallas, TX, USA) at a dilution of 1:1000. The membranes were washed three times for 10 min  
249 each with TBST, and then incubated with HRP-conjugated anti-rabbit secondary antibody  
250 (Applied Biological Materials Inc., Richmond, BC, Canada; 1: 2000 dilution) for 1 h at room  
251 temperature. After that, membranes were washed three times, 10 min each with TBST.  
252 Membranes were then incubated with ECL (enhanced chemiluminescent detection) reagent (GE  
253 Healthcare., Buckinghamshire, UK) at room temperature. The membranes were exposed to detect  
254 chemiluminescent signal using darkbox equipment (Syngene-G: Box, Frederick, MD, USA).

255

### 256 ***HuR-mediated immune pull down of HuR-TNF- $\alpha$ ARE ribonucleoprotein complex using*** 257 ***RNP-IP assay***

258 Brain tissue samples were snap-frozen in liquid nitrogen for 30 seconds before proceeding to the  
259 homogenization step. The protocol for ribonucleoprotein complex mediated immunoprecipitation  
260 (RNP-IP) was adapted from the protocol published by Keene et al. (7) with slight modifications.  
261 Tissue homogenization was done in polysome lysis buffer (100 mM KCl 5 mM MgCl<sub>2</sub>, 10 mM  
262 HEPES with a pH 7.0, 0.5% NP40, 1 mM DTT) which was supplemented with RNase inhibitor  
263 (Life Technologies, Grand Island NY) and protease and phosphatase inhibitors  
264 (ThermoScientific, Waltham, MA, USA). After homogenization, the lysates were centrifuged to  
265 collect the supernatant while discarding the pellet. Prewashed (washed three times with NT2  
266 buffer [50 mM Tris-HCl (pH 7.4), 150 mM NaCl, 1 mM MgCl<sub>2</sub>], 0.05% NP40) protein G beads  
267 (Santa Cruz Biotechnology, Dallas, TX, USA) were incubated with the HuR monoclonal  
268 antibody (EMD Millipore, Billerica, MA, USA) with overhead rotation at 4°C for an overnight  
269 period. After several washes, the prepared clear lysate was added to the HuR-coated protein G  
270 beads in NT2 buffer supplemented with RNase Inhibitor (Life Technologies, Grand Island, NY,  
271 USA) and incubated overnight at 4°C under agitation. The following day, the beads-Ab-RNP  
272 complexes were washed three times with NT2 buffer. For subsequent RNA purification, the  
273 beads were homogenized in TRIzol buffer (Life Technologies, Grand Island, NY, USA) and then  
274 followed the standard liquid phase based RNA isolation procedure including an overnight  
275 alcohol precipitation step with 20  $\mu$ g glycogen at -30°C. 1st strand cDNA was reverse

276 transcribed from the immunoprecipitated RNA pool using oligo (dT)<sub>18</sub> sequence as primer (Table  
277 S4). Further, qPCR based TNF- $\alpha$  transcript quantification was performed using the primers listed  
278 in Table S4 to determine the relative immunoenrichment of targeted 3'UTR as captured by HuR  
279 interaction in suicide subjects and healthy controls. To identify true immunoenrichment of TNF-  
280  $\alpha$  AU rich element (ARE) via HuR antibody, a nonspecific primer pair for GAPDH was used  
281 (Table S4) which was designed from coding region of the gene. Similar method was also  
282 followed to prepare the HuR-mediated RNP complex in *in-vitro* model of HEK-293 cell line in  
283 order to determine the direct interaction of HuR with the existing AU rich element on TNF- $\alpha$   
284 3'UTR under experimental manipulation.

## 285 **Human patient studies**

286

### 287 ***Subjects***

288 The study was reviewed and approved by Institutional Review Board of the University of  
289 Alabama at Birmingham and written informed consent was obtained from all subjects prior to  
290 study procedures. All participants were evaluated using the Mini International Neuropsychiatric  
291 Interview (8) or the Structured Clinical Interview for DSM-IV TR (9). Depression severity was  
292 determined using the Montgomery-Åsberg Depression Rating Scale<sup>4</sup> (MADRS) (10) and MDD  
293 suicidal patients had a MADRS item 10 score of >4. All MDD participants were psychotropic  
294 drug free prior to blood sampling. Healthy controls had no lifetime history of any mental  
295 disorder as determined by MINI or SCID. Patients were excluded with any of the following  
296 characteristics: history of bipolar disorder or any psychotic disorder; the use of lithium or an  
297 antipsychotic within the prior two weeks; substance use disorder within three months;  
298 uncontrolled clinically significant medical illnesses including the initiation of any new  
299 medications within 30 days; pregnancy or lactation. Healthy controls had no lifetime history of  
300 any mental disorder as determined by MINI or SCID. They were also excluded for any  
301 psychotropic medication; uncontrolled clinically significant medical illnesses including the  
302 initiation of any new medications within 30 days; pregnancy or lactation. There was no  
303 significant difference in age between the two groups ( $p = 0.81$ ). The gender was equally  
304 distributed among the two groups (6 males and 6 females).

### 305 ***Processing of blood samples and expression of miR-19a-3p and TNF- $\alpha$***

306 Isolation of PBMC from venous blood was carried out using Ficoll® based density gradient  
307 centrifugation method. Briefly, equal volume of freshly drawn blood and RPMI1640 media  
308 (Sigma-Aldrich, St. Louis, MO, USA) were mixed and layered on top of Ficoll and processed for  
309 centrifugation (833 x g for 20 minutes) at room temperature. Following the centrifugation, the  
310 PBMC layer lying underneath the plasma layer was carefully drawn and centrifuged at 425 x g  
311 for 10 minutes following the dilution of separated PBMC layer with fresh RPMI1640 media.  
312 PBMC pellet was washed with RPMI1640 with a brief spinning (300 x g for 5 minutes) at room  
313 temperature.

314 The washed PBMC pellet was processed for RNA isolation using TRIzol® method as  
315 described earlier. The purity and integrity of RNA samples were measured by an absorbance  
316 ratio of 260/280 (260/280 >1.8) and running the samples on agarose gel. mRNA and miRNA  
317 specific 1st strand cDNA synthesis and qRT-PCR amplifications of miR-19a-3p and TNF- $\alpha$  were  
318 conducted using the same primer sequences used for human postmortem brain studies (Table S4).

319

320 **References**

- 321 1. First MB. Diagnostic and statistical manual of mental disorders. DSM IV-4th edition APA.  
322 1994:1994.
- 323 2. Spitzer RL, Williams JB, Gibbon M, First MB. The structured clinical interview for DSM-III-  
324 R (SCID): I: history, rationale, and description. Archives of general psychiatry.  
325 1992;49:624-629.
- 326 3. Labuda M, Labuda D, Korab-Laskowska M, Cole DE, Zietkiewicz E, Weissenbach J,  
327 Popowska E, Pronicka E, Root AW, Glorieux FH. Linkage disequilibrium analysis in young  
328 populations: pseudo-vitamin D-deficiency rickets and the founder effect in French  
329 Canadians. American journal of human genetics. 1996;59:633.
- 330 4. Haines DE: Neuroanatomy: An atlas of structures, sections, and systems, Lippincott Williams  
331 & Wilkins; 2004.
- 332 5. Nolte J. The human brain: an introduction to its functional anatomy. 2002.
- 333 6. Harrison P, Heath P, Eastwood S, Burnet P, McDonald B, Pearson R. The relative importance  
334 of premortem acidosis and postmortem interval for human brain gene expression studies:  
335 selective mRNA vulnerability and comparison with their encoded proteins. Neuroscience  
336 letters. 1995;200:151-154.
- 337 7. Keene JD, Komisarow JM, Friedersdorf MB. RIP-Chip: the isolation and identification of  
338 mRNAs, microRNAs and protein components of ribonucleoprotein complexes from cell  
339 extracts. NATURE PROTOCOLS-ELECTRONIC EDITION-. 2006;1:302.
- 340 8. Sheehan DV, Lecrubier Y, Sheehan KH, Amorim P, Janavs J, Weiller E, Hergueta T, Baker  
341 R, Dunbar GC. The Mini-International Neuropsychiatric Interview (M.I.N.I.): the  
342 development and validation of a structured diagnostic psychiatric interview for DSM-IV and  
343 ICD-10. The Journal of clinical psychiatry. 1998;59 Suppl 20:22-33;quiz 34-57.
- 344 9. First MS, RL.; Gibbon, M.; Williams, JBW: Structured Clinical Interview for DSM-IV-TR  
345 Axis I Disorders, Research Version. Non-patient ed. New York, NY, Biometric Research,  
346 New York State Psychiatric Institute; 2002.
- 347 10. Montgomery SA, Asberg M. A new depression scale designed to be sensitive to change. Br J  
348 Psychiatry. 1979;134:382-389.
- 349 11. Shabalina AA. Matrix eQTL: ultra fast eQTL analysis via large matrix operations.  
350 Bioinformatics. 2012;28:1353-1358.



**Table S1: Experimental layout performed in post-mortem brain and PBMC samples**

| Assays Performed   | Gene name                                    | McGill Cohort (dlPFC) |                                              |                     | Maryland Cohort (dlPFC) |                     |                     | Patient studies (PBMC)                 |                     |
|--------------------|----------------------------------------------|-----------------------|----------------------------------------------|---------------------|-------------------------|---------------------|---------------------|----------------------------------------|---------------------|
|                    |                                              | MDD-Suicide (N)       | Suicide with other psychiatric illnesses (N) | Normal Controls (N) | MDD-suicide (N)         | MDD-non-suicide (N) | Normal controls (N) | MDD with serious suicidal ideation (N) | Normal controls (N) |
| Expression         | TNF- $\alpha$                                | (21)                  | (22)                                         | (16)                | (14)                    | (12)                | (14)                | (12)                                   | (12)                |
| Expression         | miR-19a-3p                                   | (21)                  | (22)                                         | (16)                | (14)                    | (12)                | (14)                | (12)                                   | (12)                |
| Expression         | miR-130a-3p                                  | (16)                  |                                              | (16)                |                         |                     |                     |                                        |                     |
| Expression         | miR-143-3p                                   | (16)                  |                                              | (16)                |                         |                     |                     |                                        |                     |
| Expression         | miR-187-3p                                   | (16)                  |                                              | (16)                |                         |                     |                     |                                        |                     |
| Expression         | miR-203a-3p                                  | (16)                  |                                              | (16)                |                         |                     |                     |                                        |                     |
| Expression         | miR-452-5p                                   | (16)                  |                                              | (16)                |                         |                     |                     |                                        |                     |
| Expression         | TRBP                                         | (16)                  |                                              | (16)                |                         |                     |                     |                                        |                     |
| Expression         | HuR                                          | (12)                  |                                              | (12)                |                         |                     |                     |                                        |                     |
| MeDIP              | TNF- $\alpha$ Promoter                       | (16)                  |                                              | (16)                |                         |                     |                     |                                        |                     |
| SNP based eQTL     | TNF- $\alpha$ Promoter                       | (46)                  |                                              | (22)                | (14)                    |                     | (13)                |                                        |                     |
| Mutation screening | TNF- $\alpha$ 3'UTR & miR-19a-3p seed region | (10)                  |                                              | (10)                |                         |                     |                     |                                        |                     |
| RNP-IP             | HuR-TNF- $\alpha$ ARE binding                | (9)                   |                                              | (8)                 |                         |                     |                     |                                        |                     |

**Table S2: Demographic and clinical characteristics of normal controls and suicide subjects (McGill cohort)**

|                              | Control                                             | Suicide                                                                      |                                                                | Statistical Analysis    |
|------------------------------|-----------------------------------------------------|------------------------------------------------------------------------------|----------------------------------------------------------------|-------------------------|
|                              |                                                     | MDD-Suicide                                                                  | Suicide with other psychiatric disorders                       |                         |
| <b>Number of Subjects</b>    | 16                                                  | 21                                                                           | 22                                                             | N/A                     |
| <b>Psychiatric diagnosis</b> | None                                                | MDD                                                                          | 1 OCD/4 SCHIZ/5 BD/6 None/4 Alcohol abuse/1 AD/1 ND            | N/A                     |
| <b>Age</b>                   | 35.31 ± 3.47                                        | 42.38 ± 3.03                                                                 | 37.37 ± 2.96                                                   | df=2,56, F=1.26, p=0.29 |
| <b>Gender</b>                | <b>Males</b>                                        | 16                                                                           | 19                                                             | N/A                     |
|                              | <b>Females</b>                                      | 0                                                                            | 2                                                              | N/A                     |
| <b>Postmortem interval</b>   | 34.18 ± 4.31                                        | 33.61 ± 3.76                                                                 | 37.77 ± 3.67                                                   | df=2,56, F=0.36, p=0.70 |
| <b>Brain pH</b>              | 6.54 ± 0.06                                         | 6.61 ± 0.05                                                                  | 6.52 ± 0.05                                                    | df=2,56, F=0.61, p=0.37 |
| <b>RIN</b>                   | 7.71 ± 0.16                                         | 8.15 ± 0.14                                                                  | 7.99 ± 0.14                                                    | df=2,56, F=0.44, p=0.64 |
| <b>Cause of death</b>        | 9 Cardiac arrest/6 accidental death/1 drug overdose | 13 Hanging/2 vehicle death/3 jump from height/1 CO poisoning/2 drug overdose | 2 Asphyxia/14 hanging/2 thorax laceration/3 GSW/1 CO poisoning | N/A                     |

|                                          |      |   |   |     |
|------------------------------------------|------|---|---|-----|
| <b>Antidepressant/psychoactive drugs</b> | None | 4 | 3 | N/A |
|------------------------------------------|------|---|---|-----|

AD = adjustment disorder; BP = bipolar disorder; CO = carbon monoxide; GSW = gunshot wound; MDD = major depressive disorder; N/A = not applicable; ND = Not done; OCD = obsessive compulsive disorder; SCHIZ = schizophrenia.

**Table S3: Demographic and clinical characteristics of normal controls and suicide subjects (Maryland cohort)**

|                                          | Control                                                                                | Suicide                                         |                                                                   | Statistical Analysis    |
|------------------------------------------|----------------------------------------------------------------------------------------|-------------------------------------------------|-------------------------------------------------------------------|-------------------------|
|                                          |                                                                                        | MDD-Non-suicide                                 | MDD-Suicide                                                       |                         |
| <b>Number of Subjects</b>                | 12                                                                                     | 12                                              | 14                                                                | N/A                     |
| <b>Psychiatric diagnosis</b>             | None                                                                                   | MDD                                             | MDD                                                               | N/A                     |
| <b>Age</b>                               | 40.08 ± 4.68                                                                           | 47.08 ± 4.39                                    | 38.78 ± 3.58                                                      | df=2,35, F=1.18, p=0.34 |
| <b>Gender</b>                            | <b>Males</b>                                                                           | 9                                               | 9                                                                 | N/A                     |
|                                          | <b>Females</b>                                                                         | 3                                               | 3                                                                 | N/A                     |
| <b>Postmortem interval</b>               | 18.25 ± 1.42                                                                           | 19.25 ± 2.51                                    | 18.78 ± 1.32                                                      | df=2,35, F=0.07, p=0.93 |
| <b>Brain pH</b>                          | 6.97 ± 0.04                                                                            | 6.91 ± 0.05                                     | 6.98 ± 0.04                                                       | df=2,35, F=0.69, p=0.51 |
| <b>RIN</b>                               | 7.96 ± 0.19                                                                            | 7.90 ± 0.19                                     | 7.78 ± 0.18                                                       | df=2,35, F=0.28, p=0.76 |
| <b>Cause of death</b>                    | 4 ASCVD/2 accidental death/1 natural death/2 cardiac arrhythmia/2 pneumonia/1 embolism | 9 ASCVD/1 vehicle accident/1 DKA/1 cardiomegaly | 3 Hanging/4 GSW/1 chest stab wound/2 CO poisoning/4 drug overdose | N/A                     |
| <b>Antidepressant/psychoactive drugs</b> | None                                                                                   | 5                                               | 2                                                                 | N/A                     |
| <b>Substance abuse</b>                   | None                                                                                   | 2                                               | 1                                                                 | NA                      |

ASCVD = Atherosclerosis cardiovascular disease CO = carbon monoxide; DKA = Diabetes ketoacidosis; GSW = gunshot wound; MDD = major depressive disorder; N/A = not applicable.

**Table S4: Primer sequences**

| <b>Primer</b>                 | <b>Sequences</b>                                         | <b>Experiment</b>                            |
|-------------------------------|----------------------------------------------------------|----------------------------------------------|
| TNF- $\alpha$ 3'-UTR Forward  | GGCCACTAGTAGTGGACCTTAG<br>GCCTT                          | Constructing vector of<br>pMIR-TNF- $\alpha$ |
| TNF- $\alpha$ 3'-UTR Reverse  | GGCCAAGCTTACATTGGGTCCCCCA<br>GGATA                       | Constructing vector of<br>pMIR-TNF- $\alpha$ |
| TNF- $\alpha$ Forward         | ATCCTGGGG GACCCAATGTA                                    | Gene expression                              |
| TNF- $\alpha$ Reverse         | AAAAGAAGGGCACAGAGGCCA                                    | Gene expression                              |
| TRBP Forward                  | GGCCAGCATTGCTCTATAC                                      | Gene expression                              |
| TRBP Reverse                  | CGTGGAGGCTGCAGTCACGG                                     | Gene expression                              |
| GAPDH Forward                 | AGT TAAAAGCAGCCCTGGTGA                                   | Gene expression                              |
| GAPDH Reverse                 | CCACATCGCTCAGACACCAT                                     | Gene expression                              |
| oligo dT adapter primer       | GCGAGCACAGAATTAATACGACTCA<br>CTATAGGTTTTTTTTTTTTTTTTTTVN | miRNA reverse transcription                  |
| miR-19a-3p                    | TAAGGCACGCGGTGAAT                                        | miRNA expression                             |
| U6 Forward                    | CTCGCTTCGGCAGCACA                                        | miRNA expression                             |
| U6 Reverse                    | AACGCTTCACGAATTTGCGT                                     | miRNA expression                             |
| RNP-IP-TNF- $\alpha$ Forward  | AAGTGGACCTTAGGCCTTCC                                     | RNP-IP                                       |
| RNP-IP-TNF- $\alpha$ Reverse  | CATTGGGTCCCCCAGGATAC                                     | RNP-IP                                       |
| miR-19a-3p seqForward         | TCTTCCCCATTAGGGATTATGCTG                                 | DNA sequence                                 |
| miR-19a-3p seqReverse         | ACAGTGAAGTCGAAATCTTCAG                                   | DNA sequence                                 |
| miR-19a sequencing primer     | GCCTGCTGATGTTGAGTG                                       | DNA sequence                                 |
| TNF 3'-UTR seqForward         | CGAGTCTGGGCAGGTCTACT                                     | DNA sequence                                 |
| TNF 3'-UTR seqReverse         | CCAGGGCCCTAGGAGTCTAA                                     | DNA sequence                                 |
| TNF sequencing primer F       | GCCCTGTGAGGAGGACGAA                                      | DNA sequence                                 |
| TNF sequencing primer R       | GCAAAC TTTATTTCTCGCCAC                                   | DNA sequence                                 |
| rs1800629 sequencing primer F | TGAAAGAAGAAGGCCTGCCC                                     | Genotyping analysis                          |

|                               |                           |                      |
|-------------------------------|---------------------------|----------------------|
| rs1800629 sequencing primer R | TGGTGGAGAAACCCATGAGC      | Genotyping analysis  |
| rs361525 sequencing primer F  | TGAAAGAAGAAGGCCTGCCC      | Genotyping analysis  |
| rs361525 sequencing primer R  | TGGTGGAGAAACCCATGAGC      | Genotyping analysis  |
| rs1799964 sequencing primer F | CACCCTCGATGAAGCCCAATA     | Genotyping analysis  |
| rs1799964 sequencing primer R | AGTGAAATCACCCCGGGAA       | Genotyping analysis  |
| MeDIP-TNF- F                  | TGCTCACCTTGGGGTTTCTC      | Methylation analysis |
| MeDIP- TNF- R                 | GGGAGGAAGAGACGTTTCAGG     | Methylation analysis |
| HuR– Forward                  | GCTGCGAAAAGCACATGGAA      | Gene expression      |
| HuR -Reverse                  | TCCGGCATCGGACTTGAAAA      | Gene expression      |
| Hsa-miR-203a-3p               | GTGAAATGTTTAGGACCACTAGAAA | miRNA expression     |
| Hsa-miR-143-3p                | TGAGATGAAGCACTGTAGCTC     | miRNA expression     |
| Hsa-miR-187-3p                | TCGTGTCTTGTGTTGCAGCCGG    | miRNA expression     |
| Hsa-miR-130a-3p               | CAGTGCAATGTAAAAGGGCAT     | miRNA expression     |
| Hsa-miR-452-5p                | AACTGTTTGCAGAGGAAACTGA    | miRNA expression     |
| Hsa-miR-17-5p                 | CAAAGTGCTTACAGTGCAGAA     | miRNA expression     |
| Hsa-miR-17-3p                 | TGCAGTGAAGGCACTTGTA       | miRNA expression     |
| Hsa-miR-18a-5p                | TAAGGTGCATCTAGTGCAGATAG   | miRNA expression     |
| Hsa-miR-18a-3p                | GCCCTAAGTGCTCCTTCAA       | miRNA expression     |
| Hsa-miR-20a-5p                | ATTAAAGTGCTTATAGTGCAGGTAA | miRNA expression     |
| Hsa-miR-20a-3p                | ACTGCATTATGAGCACTTAAAGA   | miRNA expression     |
| Hsa-miR-19b-1-5p              | AGTTTTGCAGGTTTGCATCCA     | miRNA expression     |
| Hsa-miR-19b-1-3p              | GTGCAAATCCATGCAAACTGA     | miRNA expression     |
| Hsa-miR-92a-1-5p              | GGTTGGGATCGGTTGCAATA      | miRNA expression     |
| Hsa-miR-92a-1-3p              | CACTTGTCCCGGCCTGTAAA      | miRNA expression     |

**Table S5: Demographic and clinical characteristics of MDD suicidal patients and healthy controls**

|                            | <b>Healthy Controls</b> | <b>MDD-Suicide</b>        |
|----------------------------|-------------------------|---------------------------|
| <b>Number of subjects</b>  | 12                      | 12                        |
| <b>Age (Years)</b>         | 41.51 ± 3.05            | 40.51 ± 2.78 <sup>a</sup> |
| <b>Gender</b>              |                         |                           |
| <b>Males</b>               | 6                       | 6                         |
| <b>Females</b>             | 6                       | 6                         |
| <b>Race</b>                |                         |                           |
| <b>White</b>               | 5                       | 5                         |
| <b>African American</b>    | 7                       | 7                         |
| <b>MADRAS</b>              | N/A                     | 38.75 ± 1.71              |
| <b>MADRS item 10 score</b> | N/A                     | ≥4                        |

MADRS: Montgomery–Åsberg Depression Rating Scale; N/A = Not applicable.

<sup>a</sup>t = 0.23, df = 22, p = 0.81

**Table S6: Effect of age, PMI and pH on gene expression in dlPFC of suicide subjects (Maryland cohort)**

| Variable | miR-19a-3p |       | TNF- $\alpha$ |       | HuR   |       |
|----------|------------|-------|---------------|-------|-------|-------|
|          | r          | p     | r             | p     | r     | p     |
| Age      | 0.034      | 0.841 | 0.37          | 0.022 | 0.058 | 0.787 |
| PMI      | 0.039      | 0.815 | 0.181         | 0.278 | 0.254 | 0.23  |
| pH       | 0.166      | 0.319 | 0.047         | 0.78  | 0.151 | 0.482 |



**Table S7: Association analysis of two SNPs between suicide subjects and normal controls**

| SNPs             | Samples        | Allele Frequency |       | OR                 | p-value | Genotype Frequency |       |       | H-W p-value |
|------------------|----------------|------------------|-------|--------------------|---------|--------------------|-------|-------|-------------|
|                  |                | A                | G     |                    |         | AA                 | AG    | GG    |             |
| <b>rs1799964</b> | Case (n=60)    | 0.778            | 0.222 | 1.167(0.604-2.252) | 0.646   | 0.603              | 0.349 | 0.048 | 0.935       |
|                  | Control (n=35) | 0.75             | 0.25  |                    |         | 0.55               | 0.4   | 0.05  | 0.673       |
| <b>rs1800629</b> | Case (n=60)    | 0.127            | 0.873 | 0.750(0.339-1.656) | 0.475   | 0.016              | 0.222 | 0.762 | 0.986       |
|                  | Control (n=35) | 0.163            | 0.838 |                    |         | 0.05               | 0.225 | 0.725 | 0.273       |

OR: Odds ratio; H-W p-value: Hardy-Weinberg equation p value

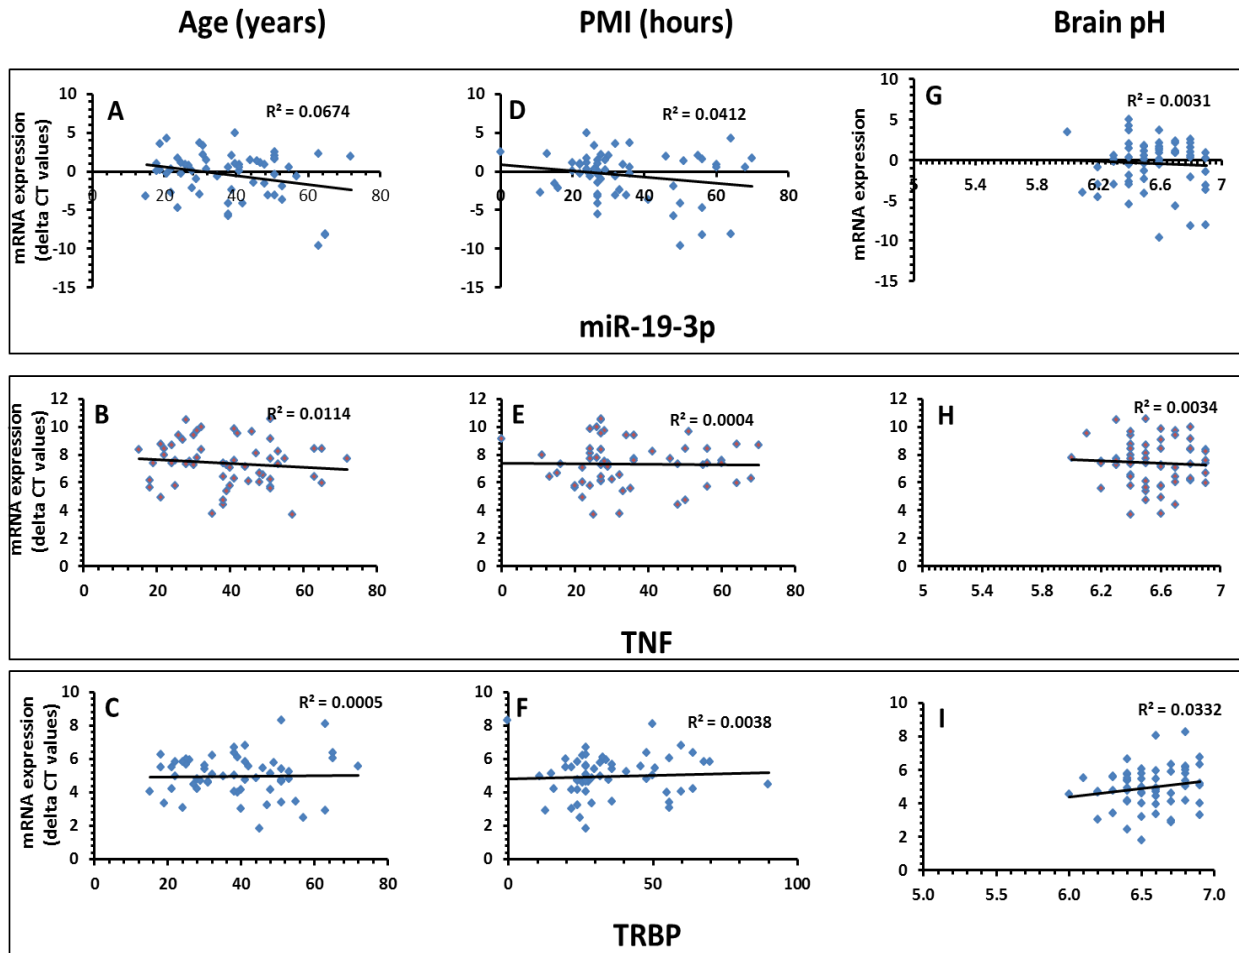

**Figure S1: Evaluation of effects of age, PMI, and brain PH on the expression TNF- $\alpha$ , miR-19a-3p, and TRBP (McGill cohort).** No significant effects of age (TNF- $\alpha$ :  $p = 0.39$ ; TRBP:  $p = 0.81$ ), PMI (miR-19a-3p:  $p = 0.22$ ; TNF- $\alpha$ :  $p = 0.76$ ; TRBP:  $p = 0.64$ ) or brain PH (miR-19a-3p:  $p = 0.67$ ; TNF- $\alpha$ :  $p = 0.66$ ; TRBP:  $p = 0.17$ ) on expression of these genes were noted except for miR-19a-3p, which showed a significant correlation with age ( $p = 0.047$ ).

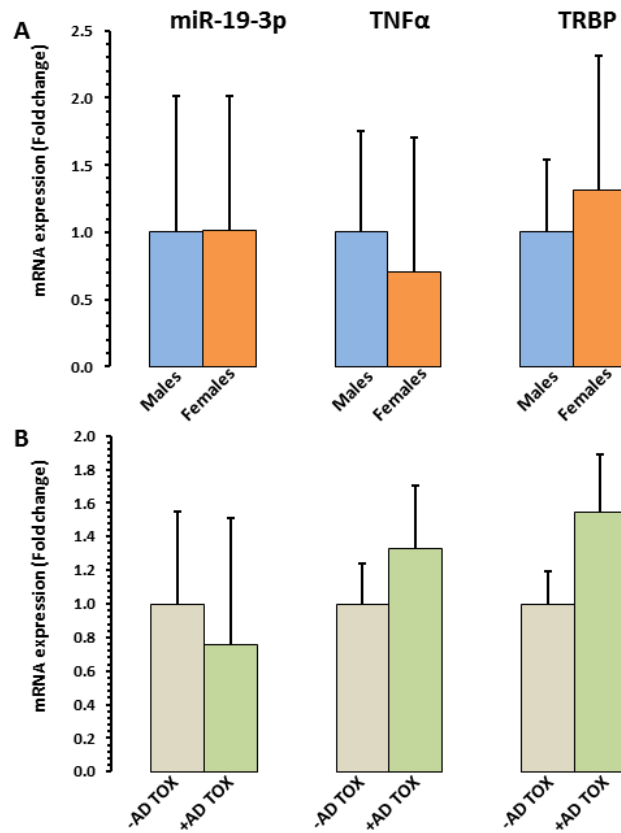

**Figure S2: Effect of gender and antidepressant toxicology on the expression of miR-19a-3p, TNF- $\alpha$ , and TRBP (McGill cohort).** (A) Comparison of expression levels between males and females showed no significant effects on these genes (miR-19a-3p:  $p = 0.38$ ; TNF- $\alpha$ :  $p = 0.69$ ; TRBP:  $p = 0.42$ ). (B) Out of 43 suicide subjects, 7 showed antidepressant toxicology at the time of death. The expression levels of these genes were not statistically different between these two groups (miR-19a-3p:  $p = 0.55$ ; TNF- $\alpha$ :  $p = 0.33$ ; TRBP:  $p = 0.08$ ).

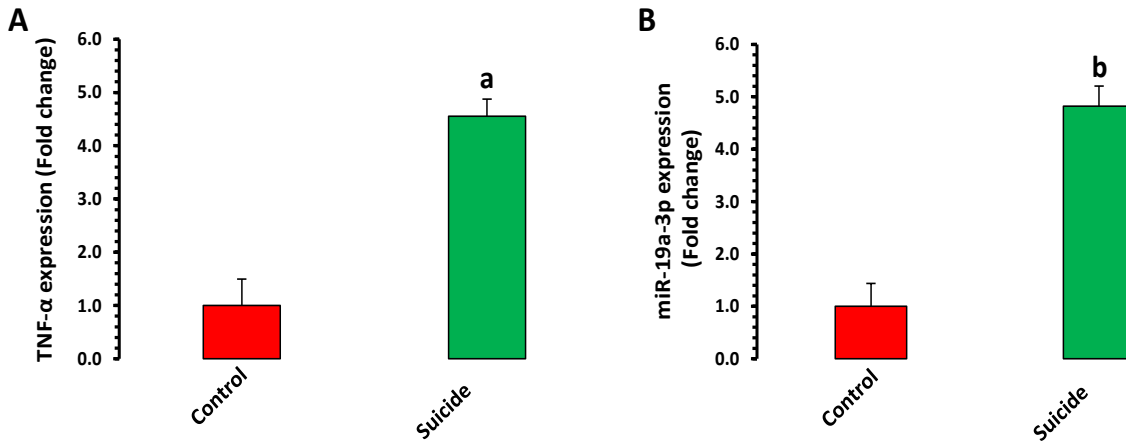

**Figure S3: TNF- $\alpha$  and miR-19a-3p transcript expression in postmortem dlPFC of suicide group in the combined Maryland and McGill cohorts.** A) TNF- $\alpha$  expression in dlPFC of normal controls (n = 28) and suicide subjects (n = 57). Data are represented as the mean  $\pm$  SEM. The level of significance was determined with independent sample t-test.  $t = 3.695$ ,  $df = 50$ ,  $^a p = 0.001$  compared with normal controls. 'a' denotes significant difference between suicide and control groups. B) miR-19a-3p expression in dlPFC of normal controls (n = 28) and suicide subjects (n = 57). Data are represented as the mean  $\pm$  SEM. The level of significance was determined by independent sample t-test.  $t = 3.90$ ,  $df = 65$ ,  $^b p = 0.0001$  compared with normal controls. 'b' denotes significant difference between suicide and control groups.

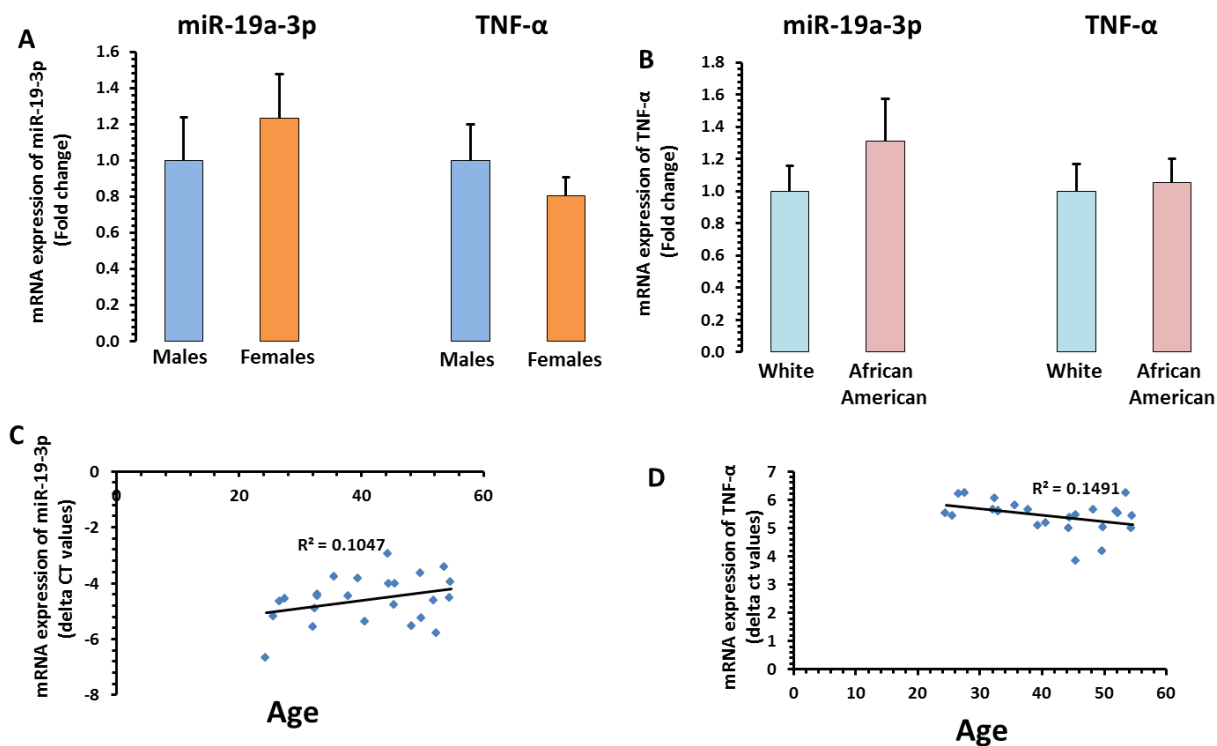

**Figure S4: Effects of gender (A), race (B), and age (C and D) on expression of miR-19a-3p and TNF- $\alpha$  in PBMC of depressed patients.** There were no significant effects of gender (miR-19a-3p,  $p = 0.42$ ; TNF- $\alpha$ ,  $p = 0.22$ ), age (miR-19a-3p,  $p = 0.12$ ; TNF- $\alpha$ ,  $p = 0.62$ ) or race (miR-19a-3p,  $p = 0.27$ ; TNF- $\alpha$ ,  $p = 0.70$ ) on the expression of genes.

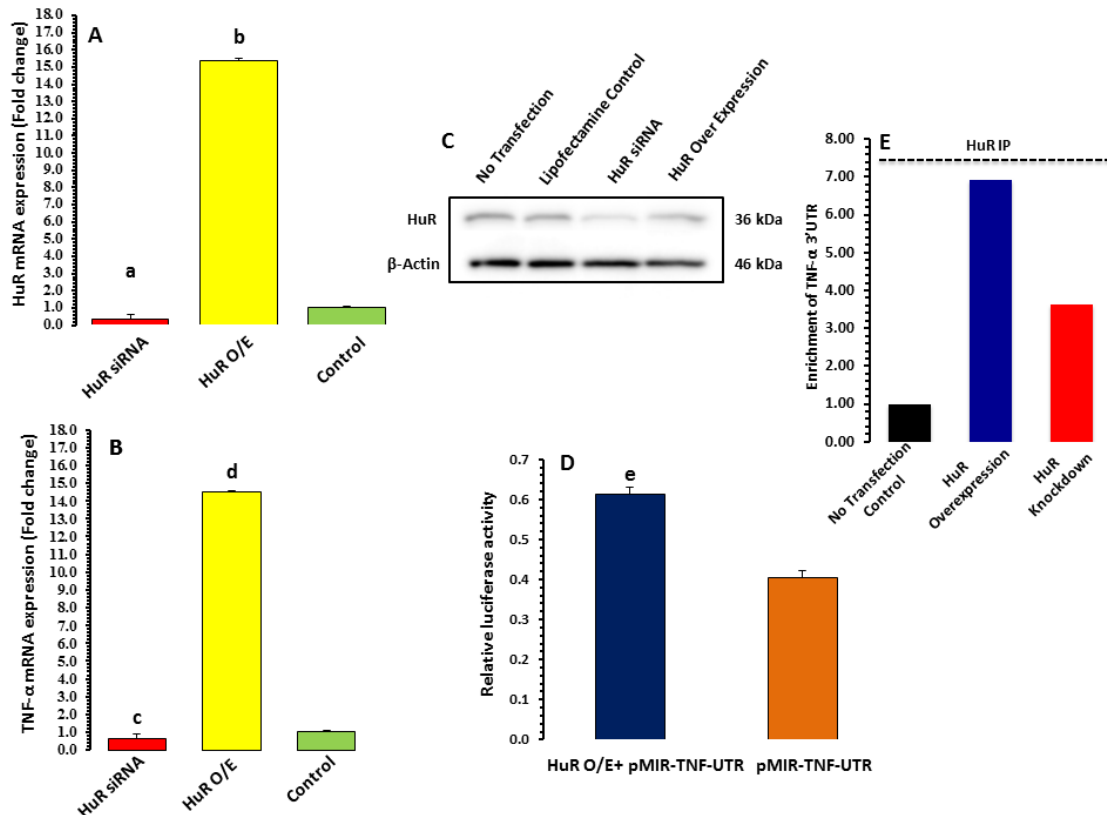

**Figure S5: HuR mRNA expression effect on the TNF- $\alpha$  mRNA expression in in-vitro cell line.** A) Real time PCR detected HuR mRNA expression after transfecting siRNA, overexpression (O/E) vector, or negative control. Bar diagrams show relative expression of HuR in each group compared with negative control (mean  $\pm$  SEM). Level of significance was determined using independent-sample 't'-test. 'a' denotes significant difference between siRNA and control groups. 'b' denotes significant difference between overexpression vector and control groups. (<sup>a</sup> $p=0.0008$ ; <sup>b</sup> $p=0.001$ ). B) TNF- $\alpha$  mRNA expression were measured in three independent experiments. Level of significance was determined using independent sample t-test. 'c' denotes significant difference between siRNA and control groups. 'd' denotes significant difference between overexpression vector and control groups (<sup>c</sup> $p=0.005$ ; <sup>d</sup> $p=0.004$ ). C) Immunoblot analysis of HuR protein in HEK-293 cells based gain and loss of function mutation model for HuR while comparing with no transfection and Lipofectamine only transfection control. A contrasting increase in HuR protein was noted in gain of function group as compared to the loss of function group mediated by HuR knockdown. D) Relative luciferase activity (normalized with Renilla luciferase activity) was determined in HEK-293 lysate co-transfected with HuR overexpression vector and pMIR-TNF-UTR compared with transfection of pMIR-TNF-UTR. The data are presented as the ratio of Firefly luciferase and Renilla luciferase activities (Mean  $\pm$  SEM). Independent t-test was utilized to evaluate the significance between the two groups (<sup>e</sup> $p= 0.0002$ ). E) In vitro HEK-293 cell line based interaction between HuR and TNF- $\alpha$  AU rich element was determined by HuR antibody-mediated RNP-IP assay. Relative 3'UTR enrichment was determined after normalizing with 10% input. Approximately 7 fold enrichment of TNF- $\alpha$  3'UTR was observed in HuR overexpression group as compared to no transfection control; whereas approximately 50% decrease in this enrichment of interaction was noticed under HuR depletion.

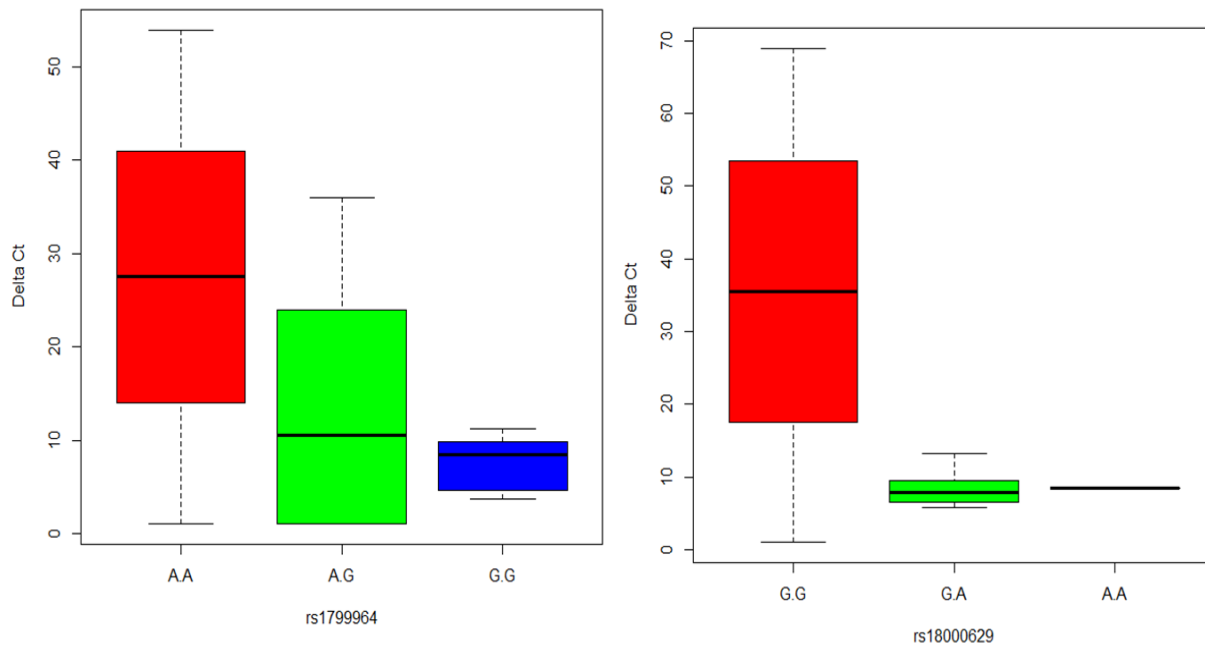

**Figure S6: Box plots showing the complete distribution of *TNF- $\alpha$*  in McGill cohort samples, expressed as  $\Delta$ Ct on the y-axis.** The distribution of  $\Delta$ Ct *TNF- $\alpha$*  mRNA according to three individual genotypes for rs1799964 and rs18000629 are shown in box plots. For both SNPs, homozygotes for the major allele have the higher median  $\Delta$ Ct of *TNF- $\alpha$* , whereas homozygotes for the minor allele have the lower median  $\Delta$ Ct *TNF- $\alpha$* . ANOVA analysis suggested that both SNPs were not significant between the three genotypes (rs1799964: 0.1973; rs18000629:0.5482). We also utilized the software “Matrix eQTL” which accounted for covariates including sex and age (11). Matrix eQTL analysis further confirmed that both rs1799964 and rs18000629 were not significantly associated with the *TNF- $\alpha$*  mRNA expression ( $p > 0.05$ ).

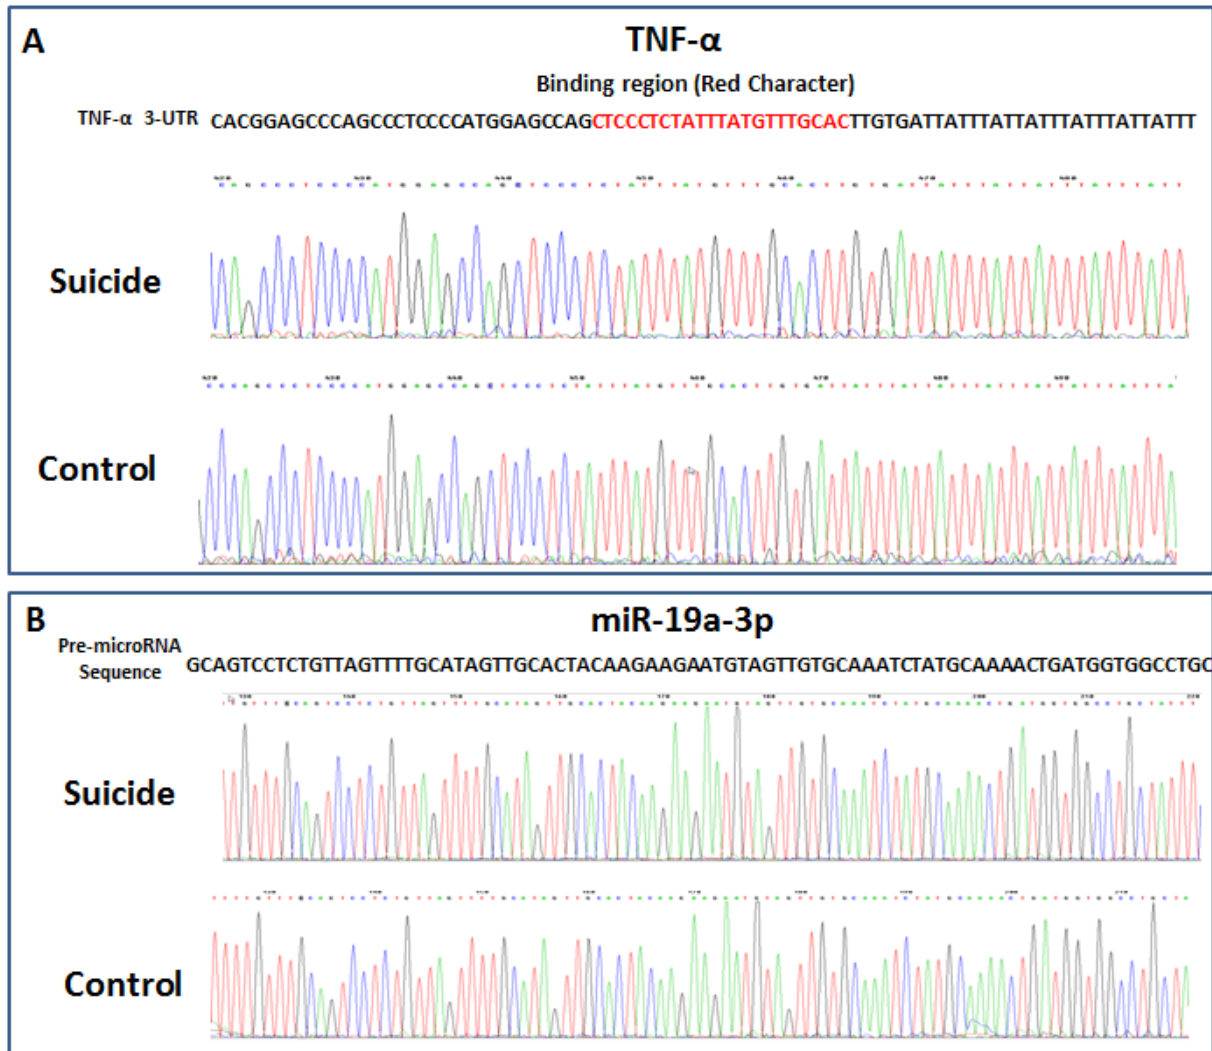

**Figure S7: Comparative sequence analysis of the TNF- $\alpha$  and miR-19a-3p between suicide subjects (n = 10) and normal controls (n = 10).** Representative sequencing from one control and one suicide subject for TNF- $\alpha$  is demonstrated in Figure S7A and for miR-19a-3p in Figure S7B. Consensus sequence in TNF- $\alpha$  3-UTR for miR-19a-3p binding and seed sequence in pre-miR-19a-3p are indicated in the corresponding sections. There was no difference in the consensus sequence between the suicide subjects and normal controls.



Human TNF ENST00000449264.2 3' UTR length: 799

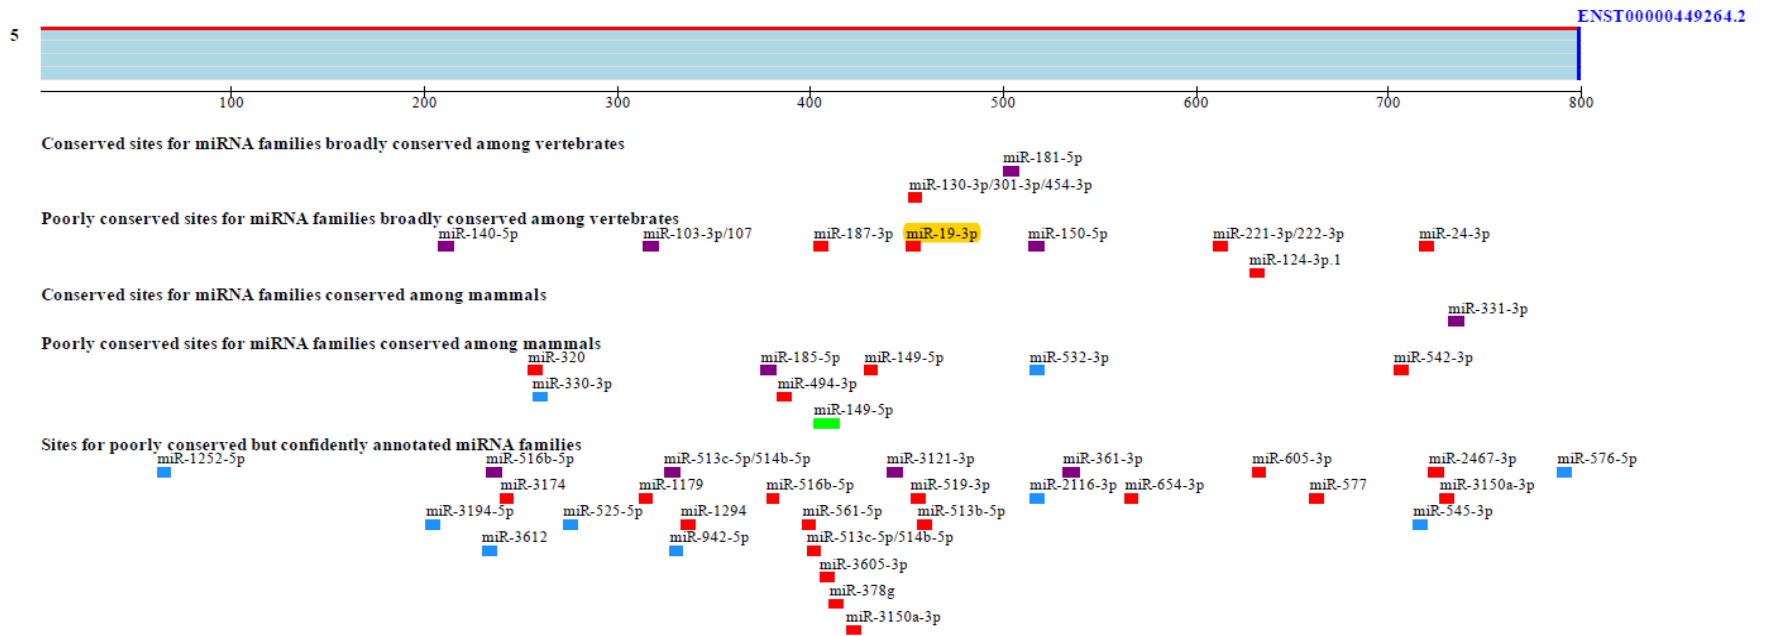

Figure S8: Human TNF- $\alpha$  3'UTR map to identify putative binding sites of miRNAs based on their site conservation across class including higher mammals.
